# Supplementary material
Source: PubMed Central journal article supplement (PMC3249112)
Supplement: supp_M111.304337_jbc.M111.304337-1.pdf [file supp_M111.304337_jbc.M111.304337-1.pdf]

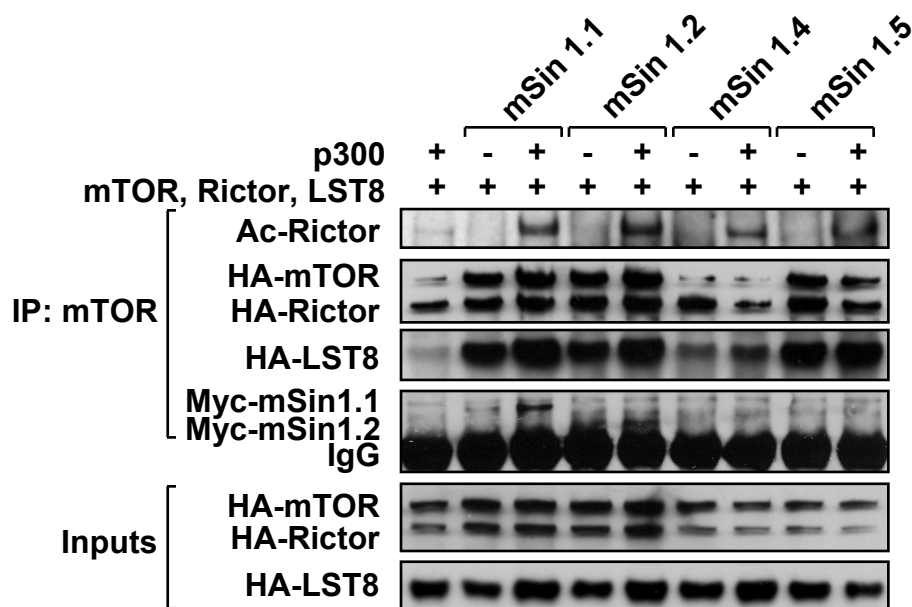

**Supplemental Figure 1. Expression of mTORC2 with mSin1.1, mSin1.2 or mSin1.5 increases Rictor acetylation.** Acetylation assays were performed as described in Figure 1E. HEK293T cells were transfected with mTORC2 components (mTOR, Rictor, and LST8) and with myc-tagged mSin1.1, mSin1.2, mSin1.4 or mSin1.5. Only mSin1.1 and 1.2 can be observed following immunoprecipitation. Representative data from one of three independent experiments are shown.

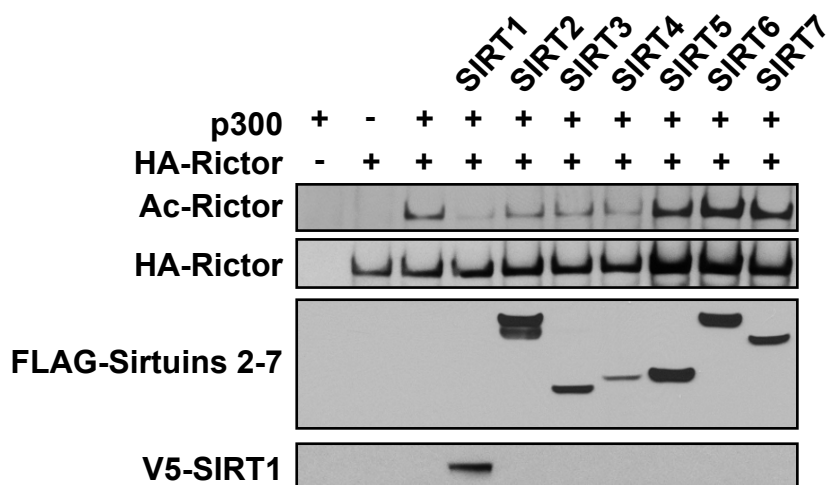

**Supplemental Figure 2. Sirtuins 1-4 effectively deacetylate Rictor.** HEK 293T cells were transfected with HA-Rictor, p300, or with V5-SIRT1 or FLAG-SIRT2-7. HA-tagged Rictor was immunoprecipitated and analyzed for acetylation by immunoblotting. Total Rictor and Sirtuin proteins were detected by Western blotting.
